# Supplementary material for: An Overview of Ovarian Calyx Fluid Proteins of Toxoneuron nigriceps (Viereck) (Hymenoptera: Braconidae): An Integrated Transcriptomic and Proteomic Approach
Source: MDPI journal article supplement (doi:10.3390/biom13101547), 2023-10-19
Supplement: s1 [file s1]

| N. | Contig code | Functional annotatio                                                                          | ORF    |
|----|-------------|-----------------------------------------------------------------------------------------------|--------|
| 1  | T_C1643     | puromycin-sensitive aminopeptidase isoform X2 [Cotesia glomerata]                             | CLOSED |
| 2  | T_C33       | putative heat shock 70 kDa protein cognate 4 [Cotesia chilonis]                               | CLOSED |
| 3  | T_C1002     | hypothetical protein G9C98_004494 [Cotesia typhae]                                            | CLOSED |
| 4  | T_C2350     | 60 kDa heat shock protein, mitochondrial-like [Fopius arisanus]                               | CLOSED |
| 5  | T_C2380     | putative aldeihyde dehydrogenase, mitochondrial [Cotesia chilonis]                            | OPEN   |
| 6  | T_C2989     | A disintegrin and metalloproteinase with thrombospondin motifs 1-like [Microplitis demolitor] | OPEN   |
| 7  | T_C116      | FK506-binding protein 59 isoform X1 [Microplitis demolitor]                                   | OPEN   |
| 8  | T_C1266     | rab GDP dissociation inhibitor alpha [Microplitis demolitor]                                  | CLOSED |
| 9  | T_C376      | putative phosphoglycerate kinase [Cotesia chilonis]                                           | CLOSED |
| 10 | T_C1316     | arginine kinase [Microplitis demolitor]                                                       | CLOSED |
| 11 | T_C2661     | putative malate dehydrogenase, cytoplasmic [Cotesia chilonis]                                 | OPEN   |
| 12 | T_C38       | enolase isoform X2 [Microplitis demolitor]                                                    | OPEN   |
| 13 | T_C1057     | aldose reductase [Microplitis demolitor]                                                      | OPEN   |
| 14 | T_C3197     | aldo-keto reductase family 1 member B1-like [Cotesia glomerata]                               | CLOSED |
| 15 | T_C1145     | UDP-glucose 4-epimerase isoform X4 [Diachasma alloeum]                                        | OPEN   |
| 16 | T_C118      | eukaryotic translation initiation factor 3 subunit M isoform X2 [Microplitis demolitor]       | CLOSED |
| 17 | T_C1239     | inositol-3-phosphate synthase 1-B [Cotesia glomerata]                                         | OPEN   |
| 18 | T_C1593     | DNA-(apurinic or apyrimidinic site)                                                           | OPEN   |

|    |         |                                                                                                              |        |
|----|---------|--------------------------------------------------------------------------------------------------------------|--------|
|    |         | endonuclease [Cotesia glomerata]                                                                             |        |
| 19 | T_C2695 | glyoxalase domain-containing protein 4 [Microplitis demolitor]                                               | OPEN   |
| 20 | T_C1343 | Actin, muscle [Eumeta japonica]                                                                              | CLOSED |
| 21 | T_C1333 | putative ester hydrolase C11orf54 homolog [Cotesia chilonis]                                                 | CLOSED |
| 22 | T_C2877 | protein phosphatase 1 regulatory subunit 7 [Cotesia glomerata]                                               | CLOSED |
| 23 | T_C242  | putative 14-3-3 protein zeta isoform X1 [Cotesia chilonis]                                                   | OPEN   |
| 24 | T_C2966 | phosphoglycerate mutase 2 [Cotesia glomerata]                                                                | OPEN   |
| 25 | T_C1460 | dihydropteridine reductase [Chelonius insularis]                                                             | CLOSED |
| 26 | T_C262  | dr1-associated corepressor homolog [Microplitis demolitor]                                                   | OPEN   |
| 27 | T_C2742 | lipoyl synthase, mitochondrial [Cotesia glomerata]                                                           | OPEN   |
| 28 | T_C3314 | cytosolic non-specific dipeptidase [Microplitis demolitor]                                                   | OPEN   |
| 29 | T_C2943 | hydroxyacylglutathione hydrolase, mitochondrial [Microplitis demolitor]                                      | OPEN   |
| 30 | T_C1759 | threonine--tRNA ligase, cytoplasmic isoform X2 [Microplitis demolitor]                                       | CLOSED |
| 31 | T_C1759 | proteasome subunit alpha type-3 [Microplitis demolitor]                                                      | OPEN   |
| 32 | T_C338  | Eukaryotic translation initiation factor 3 subunit I [Cotesia chilonis]                                      | OPEN   |
| 33 | T_C290  | proteasome subunit alpha type-7-1 [Diachasma alloeum]                                                        | OPEN   |
| 34 | T_C3107 | eukaryotic translation initiation factor 3 subunit I [Microplitis demolitor]                                 | CLOSED |
| 35 | T_C2496 | phosphatidylinositol transfer protein alpha isoform isoform X1 [Microplitis demolitor]                       | CLOSED |
| 36 | T_C1536 | putative mitochondrial complement component 1 Q subcomponent-binding protein-like protein [Cotesia chilonis] | OPEN   |

|    |         |                                                                                     |        |
|----|---------|-------------------------------------------------------------------------------------|--------|
| 37 | T_C3087 | proteasome subunit alpha type-4 [Chelonus insularis]                                | OPEN   |
| 38 | T_C2601 | 26S proteasome non-ATPase regulatory subunit 10 [Microplitis demolitor]             | OPEN   |
| 39 | T_C2043 | glutathione S-transferase [Microplitis demolitor]                                   | OPEN   |
| 40 | T_C220  | glutathione S-transferase-like [Cotesia glomerata]                                  | OPEN   |
| 41 | T_C1492 | heat shock 70 kDa protein 4 [Microplitis demolitor]                                 | CLOSED |
| 42 | T_C333  | protein D2 isoform X2 [Microplitis demolitor]                                       | OPEN   |
| 43 | T_C1184 | proteasome subunit beta type-2 [Microplitis demolitor]                              | OPEN   |
| 44 | T_C3115 | proteasome subunit beta type-6 [Microplitis demolitor]                              | OPEN   |
| 45 | T_C3284 | 26S proteasome non-ATPase regulatory subunit 7 [Microplitis demolitor]              | CLOSED |
| 46 | T_C201  | glyceraldehyde-3-phosphate dehydrogenase [Microplitis demolitor]                    | OPEN   |
| 47 | T_C2290 | peroxiredoxin-5, mitochondrial [Cotesia glomerata]                                  | CLOSED |
| 48 | T_C1443 | replication factor C subunit 3 [Microplitis demolitor]                              | OPEN   |
| 49 | T_C102  | elongation factor 1-gamma [Microplitis demolitor]                                   | CLOSED |
| 50 | T_C349  | Similar to PCNA: Proliferating cell nuclear antigen [Cotesia congregata]            | OPEN   |
| 51 | T_C1866 | activated RNA polymerase II transcriptional coactivator p15 [Microplitis demolitor] | OPEN   |
| 52 | T_C3427 | myophilin isoform X1 [Microplitis demolitor]                                        | OPEN   |
| 53 | T_C1835 | cytochrome c [Osmia bicornis bicornis]                                              | OPEN   |
| 54 | T_C1534 | SEC14-like protein 2 [Microplitis demolitor]                                        | OPEN   |
