# Supplementary material for: An Overview of Ovarian Calyx Fluid Proteins of Toxoneuron nigriceps (Viereck) (Hymenoptera: Braconidae): An Integrated Transcriptomic and Proteomic Approach
Source: MDPI journal article supplement (doi:10.3390/biom13101547), 2023-10-19
Supplement: s1 [file s1]

| Line | Peptides | Contig  | Frame<br>n° | Sequence<br>coverage | Name                                                                                                   |
|------|----------|---------|-------------|----------------------|--------------------------------------------------------------------------------------------------------|
| 1    | NO ID    |         |             |                      |                                                                                                        |
| 2    | 31       | T_C1643 | 3           | 35%                  | puromycin-sensitive<br>aminopeptidase isoform X2<br>[Cotesia glomerata]                                |
|      | 29       | T_C3890 | 2           | 23%                  | uncharacterized protein<br>LOC103568231 [Microplitis<br>demolitor]                                     |
| 3    | 48       | T_C141  | 5           | 75%                  | transferrin [Cotesia flavipes]                                                                         |
|      | 26       | T_C2568 | 5           | 34%                  | dipeptidyl peptidase 3 isoform X1<br>[Microplitis demolitor]                                           |
|      | 21       | T_C2767 | 2           | 34%                  | putative prolyl endopeptidase<br>[Cotesia chilonis]                                                    |
|      | 11       | T_C1743 | 4           | 15%                  | Cytoplasmic aconitate hydratase<br>[Cotesia chilonis]                                                  |
|      | 8        | T_C241  | 3           | 12%                  | replication factor C subunit 1<br>[Microplitis demolitor]                                              |
| 4    | 26       | T_C387  | 1           | 48%                  | uncharacterized protein<br>LOC103580511 isoform X2<br>[Microplitis demolitor]                          |
|      | 23       | T_C33   | 6           | 41%                  | putative heat shock 70 kDa protein<br>cognate 4 [Cotesia chilonis]                                     |
|      | 16       | T_C216  | 3           | 23%                  | uncharacterized protein<br>LOC103580511 isoform X2<br>[Microplitis demolitor]                          |
|      | 13       | T_C1002 | 4           | 33%                  | hypothetical protein G9C98_004494<br>[Cotesia typhae]                                                  |
|      | 9        | T_C2350 | 6           | 23%                  | 60 kDa heat shock protein,<br>mitochondrial-like [Fopius<br>arisanus]                                  |
|      | 8        | T_C1259 | 2           | 12%                  | uncharacterized protein<br>LOC103580511 isoform X1<br>[Microplitis demolitor]                          |
|      | 5        | T_C1206 | 4           | 13%                  | putative envelope protein ODV-<br>E66-2 [Microplitis demolitor]                                        |
| 5    | 21       | T_C1221 | 3           | 48%                  | cytosol aminopeptidase [Cotesia<br>chilonis]                                                           |
|      | 13       | T_C2380 | 6           | 35%                  | putative aldehyde dehydrogenase,<br>mitochondrial [Cotesia chilonis]                                   |
|      | 15       | T_C2225 | 5           | 28%                  | protein disulfide-isomerase<br>[Microplitis demolitor]                                                 |
|      | 9        | T_C1074 | 1           | 18%                  | toll-like receptor 13 [Microplitis<br>demolitor]                                                       |
|      | 8        | T_C3830 | 1           | 21%                  | retinoid-inducible serine<br>carboxypeptidase-like [Cotesia<br>glomerata]                              |
|      | 5        | T_C351  | 3           | 11%                  | trehalase-like [Microplitis<br>demolitor]                                                              |
|      | 4        | T_C2989 | 2           | 10%                  | A disintegrin and<br>metalloproteinase with<br>thrombospondin motifs 1-like<br>[Microplitis demolitor] |

|   |    |         |   |     |                                                                                         |
|---|----|---------|---|-----|-----------------------------------------------------------------------------------------|
| 6 | 24 | T_C116  | 1 | 51% | FK506-binding protein 59 isoform X1 [Microplitis demolitor]                             |
|   | 13 | T_C1266 | 4 | 35% | rab GDP dissociation inhibitor alpha [Microplitis demolitor]                            |
|   | 4  | T_C2385 | 5 | 11% | alpha-N-acetylgalactosaminidase [Cotesia glomerata]                                     |
|   | 4  | T_C3206 | 4 | 10% | esterase FE4-like [Chelonus insularis]                                                  |
|   | 10 | T_C2581 | 3 | 22% | putative adenosylhomocysteinase [Cotesia chilonis]                                      |
|   | 17 | T_C376  | 6 | 40% | putative phosphoglycerate kinase [Cotesia chilonis]                                     |
| 7 | 25 | T_C1316 | 5 | 60% | arginine kinase [Microplitis demolitor]                                                 |
|   | 13 | T_C271  | 6 | 43% | uncharacterized protein LOC103572160 [Microplitis demolitor]                            |
|   | 10 | T_C3785 | 4 | 27% | uncharacterized protein LOC103574027 [Microplitis demolitor]                            |
|   | 10 | T_C3024 | 2 | 50% | leukocyte elastase inhibitor-like isoform X3 [Cotesia glomerata]                        |
|   | 10 | T_C2661 | 1 | 21% | putative malate dehydrogenase, cytoplasmic [Cotesia chilonis]                           |
|   | 7  | T_C38   | 4 | 19% | enolase isoform X2 [Microplitis demolitor]                                              |
|   | 8  | T_C2407 | 6 | 18% | putative uncharacterized protein DDB_G0286901 [Microplitis demolitor]                   |
|   | 4  | T_C3680 | 2 | 11% | uncharacterized protein Vlf-1 [Microplitis demolitor]                                   |
|   | 4  | T_C3228 | 3 | 15% | putative inorganic pyrophosphatase [Cotesia chilonis]                                   |
|   | 3  | T_C127  | 4 | 14% | calcineurin-binding protein cabin-1 [Microplitis demolitor]                             |
| 8 | 21 | T_C1057 | 6 | 53% | aldose reductase [Microplitis demolitor]                                                |
|   | 15 | T_C3197 | 3 | 47% | aldo-keto reductase family 1 member B1-like [Cotesia glomerata]                         |
|   | 15 | T_C1145 | 4 | 47% | UDP-glucose 4-epimerase isoform X4 [Diachasma alloeum]                                  |
|   | 11 | T_C1283 | 2 | 37% | uncharacterized protein Vp39 [Microplitis demolitor]                                    |
|   | 13 | T_C118  | 4 | 28% | eukaryotic translation initiation factor 3 subunit M isoform X2 [Microplitis demolitor] |
|   | 8  | T_C1629 | 1 | 19% | major royal jelly protein 5 [Microplitis demolitor]                                     |
|   | 5  | T_C1800 | 2 | 18% | coiled-coil domain-containing protein 186 [Microplitis demolitor]                       |
|   | 6  | T_C1239 | 2 | 13% | inositol-3-phosphate synthase 1-B [Cotesia glomerata]                                   |

|   |    |         |   |     |                                                                                        |
|---|----|---------|---|-----|----------------------------------------------------------------------------------------|
|   | 4  | T_C1593 | 3 | 12% | DNA-(apurinic or apyrimidinic site) endonuclease [Cotesia glomerata]                   |
|   | 8  | T_C2695 | 1 | 28% | glyoxalase domain-containing protein 4 [Microplitis demolitor]                         |
|   | 7  | T_C205  | 4 | 21% | lysosomal aspartic protease-like [Microplitis demolitor]                               |
|   | 5  | T_C1125 | 6 | 13% | chitinase-like protein Idgf4 [Microplitis demolitor]                                   |
|   | 4  | T_C1343 | 6 | 14% | Actin, muscle [Eumeta japonica]                                                        |
|   | 4  | T_C1227 | 1 | 12% | serpin B6 isoform X2 [Microplitis demolitor]                                           |
|   | 4  | T_C1333 | 4 | 16% | putative ester hydrolase C11orf54 homolog [Cotesia chilonis]                           |
|   | 5  | T_C1672 | 5 | 13% | uncharacterized protein LOC103568677 [Microplitis demolitor]                           |
|   | 4  | T_C2877 | 6 | 11% | protein phosphatase 1 regulatory subunit 7 [Cotesia glomerata]                         |
| 9 | 13 | T_C242  | 2 | 39% | putative 14-3-3 protein zeta isoform X1 [Cotesia chilonis]                             |
|   | 19 | T_C2966 | 3 | 46% | phosphoglycerate mutase 2 [Cotesia glomerata]                                          |
|   | 7  | T_C1460 | 5 | 40% | dihydropteridine reductase [Chelonius insularis]                                       |
|   | 6  | T_C262  | 5 | 22% | dr1-associated corepressor homolog [Microplitis demolitor]                             |
|   | 8  | T_C2742 | 5 | 30% | lipoyl synthase, mitochondrial [Cotesia glomerata]                                     |
|   | 8  | T_C3314 | 4 | 19% | cytosolic non-specific dipeptidase [Microplitis demolitor]                             |
|   | 8  | T_C2943 | 6 | 31% | hydroxyacylglutathione hydrolase, mitochondrial [Microplitis demolitor]                |
|   | 5  | T_C1175 | 2 | 13% | threonine--tRNA ligase, cytoplasmic isoform X2 [Microplitis demolitor]                 |
|   | 5  | T_C2669 | 4 | 25% | putative envelope protein ODV-E66-17 [Microplitis demolitor]                           |
|   | 3  | T_C3720 | 1 | 14% | S-methyl-5'-thioadenosine phosphorylase [Cotesia glomerata]                            |
|   | 4  | T_C1759 | 1 | 14% | proteasome subunit alpha type-3 [Microplitis demolitor]                                |
|   | 3  | T_C338  | 2 | 10% | Eukaryotic translation initiation factor 3 subunit I [Cotesia chilonis]                |
|   | 3  | T_C290  | 5 | 15% | proteasome subunit alpha type-7-1 [Diachasma alloenum]                                 |
|   | 3  | T_C3107 | 4 | 10% | eukaryotic translation initiation factor 3 subunit I [Microplitis demolitor]           |
|   | 5  | T_C2496 | 5 | 22% | phosphatidylinositol transfer protein alpha isoform isoform X1 [Microplitis demolitor] |

|    |    |          |   |     |                                                                                                              |
|----|----|----------|---|-----|--------------------------------------------------------------------------------------------------------------|
|    | 4  | T_C1536  | 3 | 10% | putative mitochondrial complement component 1 Q subcomponent-binding protein-like protein [Cotesia chilonis] |
|    | 3  | T_C346   | 4 | 12% | ribonuclease Oy [Cotesia glomerata]                                                                          |
|    | 2  | T_C3087  | 2 | 13% | proteasome subunit alpha type-4 [Chelonius insularis]                                                        |
|    | 2  | T_C2601  | 5 | 10% | 26S proteasome non-ATPase regulatory subunit 10 [Microplitis demolitor]                                      |
| 10 | 15 | T_C2043  | 1 | 51% | glutathione S-transferase [Microplitis demolitor]                                                            |
|    | 8  | T_C2091  | 2 | 15% | stress-induced-phosphoprotein 1 [Microplitis demolitor]                                                      |
|    | 9  | T_C2739  | 5 | 36% | Krueppel homolog 1-like [Cotesia glomerata]                                                                  |
|    | 6  | T_C220   | 2 | 20% | glutathione S-transferase-like [Cotesia glomerata]                                                           |
|    | 6  | T_C2055  | 1 | 24% | putative ferritin heavy polypeptide-like 17 isoform X1 [Cotesia chilonis]                                    |
| 11 | 12 | T_C1492  | 6 | 36% | heat shock 70 kDa protein 4 [Microplitis demolitor]                                                          |
|    | 9  | T_C333   | 6 | 45% | protein D2 isoform X2 [Microplitis demolitor]                                                                |
|    | 5  | T_C1929  | 4 | 13% | uncharacterized protein 35a-6 [Microplitis demolitor]                                                        |
|    | 4  | T_C1184  | 4 | 15% | proteasome subunit beta type-2 [Microplitis demolitor]                                                       |
|    | 3  | T_C3115  | 5 | 12% | proteasome subunit beta type-6 [Microplitis demolitor]                                                       |
|    | 5  | T_C1171  | 3 | 18% | dymeclin isoform X2 [Cotesia glomerata]                                                                      |
|    | 2  | T_C3284  | 1 | 11% | 26S proteasome non-ATPase regulatory subunit 7 [Microplitis demolitor]                                       |
| 12 | 15 | T_C201   | 5 | 54% | glyceraldehyde-3-phosphate dehydrogenase [Microplitis demolitor]                                             |
|    | 7  | T_C367   | 2 | 35% | putative peroxiredoxin 1 [Cotesia chilonis]                                                                  |
|    | 7  | T_C1185  | 5 | 48% | superoxide dismutase [Cu-Zn] [Microplitis demolitor]                                                         |
|    | 7  | T_C154   | 5 | 33% | peptidyl-prolyl cis-trans isomerase-like [Microplitis demolitor]                                             |
|    | 5  | T_C2290  | 6 | 25% | peroxiredoxin-5, mitochondrial [Cotesia glomerata]                                                           |
|    | 2  | T_C1443  | 4 | 16% | replication factor C subunit 3 [Microplitis demolitor]                                                       |
|    | 3  | T_C2276  | 3 | 11% | programmed cell death protein 6 isoform X1 [Cotesia glomerata]                                               |
|    | 4  | T_C10718 | 1 | 35% | neprilysin-11-like [Microplitis demolitor]                                                                   |
|    | 3  | T_C1271  | 1 | 24% | calmodulin [Aeromonas veronii]                                                                               |

|    |      |          |   |     |                                                                                     |
|----|------|----------|---|-----|-------------------------------------------------------------------------------------|
|    | 2    | T_C12915 | 3 | 20% | U-scoloptoxin(19)-Sm1a [Chelonus insularis]                                         |
| 13 | 8    | T_C3625  | 6 | 74% | glutaredoxin-C4 isoform X1 [Microplitis demolitor]                                  |
|    | 6    | T_C1735  | 3 | 11% | replication protein A 70 kDa DNA-binding subunit [Microplitis demolitor]            |
|    | 6    | T_C102   | 3 | 12% | elongation factor 1-gamma [Microplitis demolitor]                                   |
|    | 4    | T_C3432  | 6 | 13% | eukaryotic translation initiation factor 2 subunit 1 [Cotesia glomerata]            |
|    | 7    | T_C349   | 6 | 26% | Similar to PCNA: Proliferating cell nuclear antigen [Cotesia congregata]            |
|    | 6    | T_C1034  | 1 | 33% | uncharacterized protein LOC118066271 [Chelonus insularis]                           |
|    | 4(3) | T_C1866  | 3 | 36% | activated RNA polymerase II transcriptional coactivator p15 [Microplitis demolitor] |
|    | 3(2) | T_C3427  | 5 | 16% | myophilin isoform X1 [Microplitis demolitor]                                        |
|    | 2(2) | T_C1835  | 1 | 17% | cytochrome c [Osmia bicornis bicornis]                                              |
|    | 2(2) | T_C1534  | 4 | 13% | SEC14-like protein 2 [Microplitis demolitor]                                        |
